# Supplementary material
Source: PubMed Central journal article supplement (PMC3011265)
Supplement: cam0404_0541SD1.pdf [file cam0404_0541SD1.pdf]

**Figure S1A:**

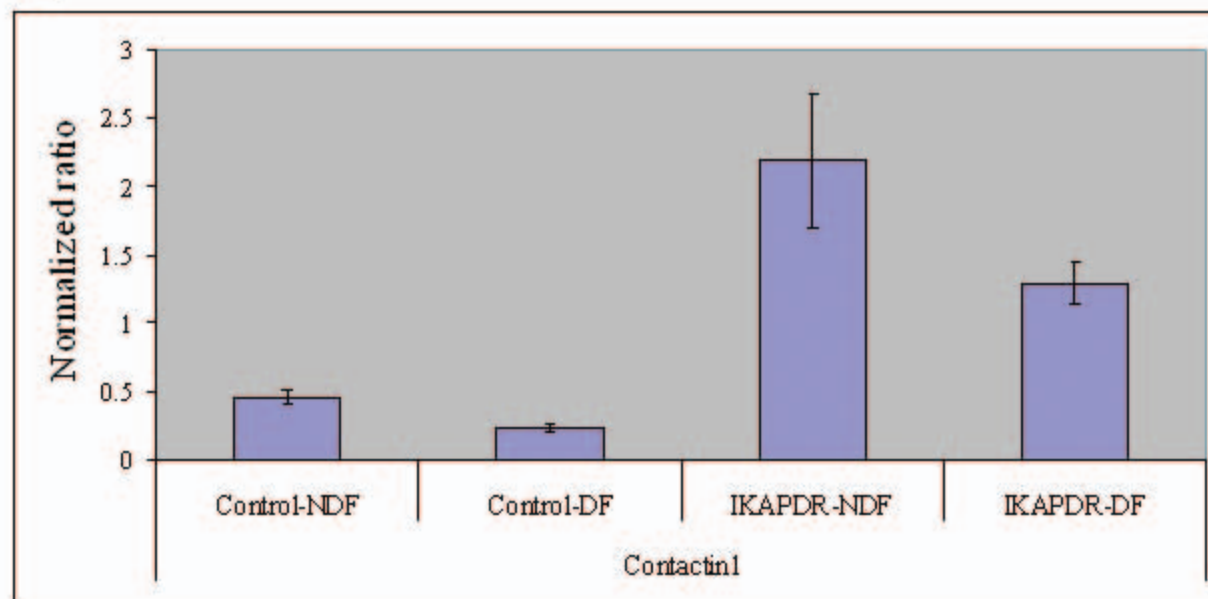

**Figure S1A:** RNA expression of Contactin measured by qRT-PCR of IKAPDR cells and control cells in non differentiation (NDF) or differentiation (DF) growth conditions. Results are the summary of 2 biological repeats for control cells, each with 2 technical repeats, and 3 biological repeats for IKAPDR cells each with two technical repeats. The expression of the ribosomal RNA gene RS9 was used for normalization.

**Figure S1B:**

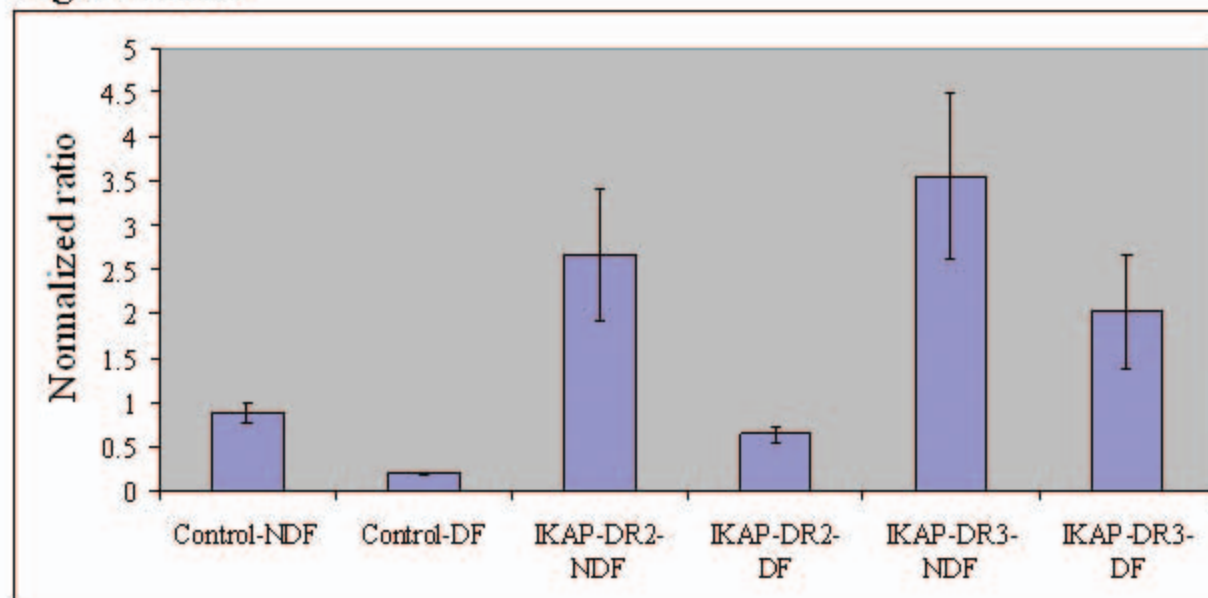

**Figure S1B:** Expression of Contactin measured by qRT-PCR of two other IKAPDR SHSY5Y cell lines: IKAPDR2 and IKAPDR3, compared to control, under non differentiation (NDF) or differentiation (DF) growth conditions. The number of repeats is as for figure S1A, 2 for control cells and 3 for IKAPDR cells. The expression of the ribosomal RNA gene RS9 was used for normalization. The viruses used to generate IKAPDR 2 and IKAPDR3 contained plasmids TRCN0000037872 and TRCN0000037873 (Sigma), respectively.

Figure S2:

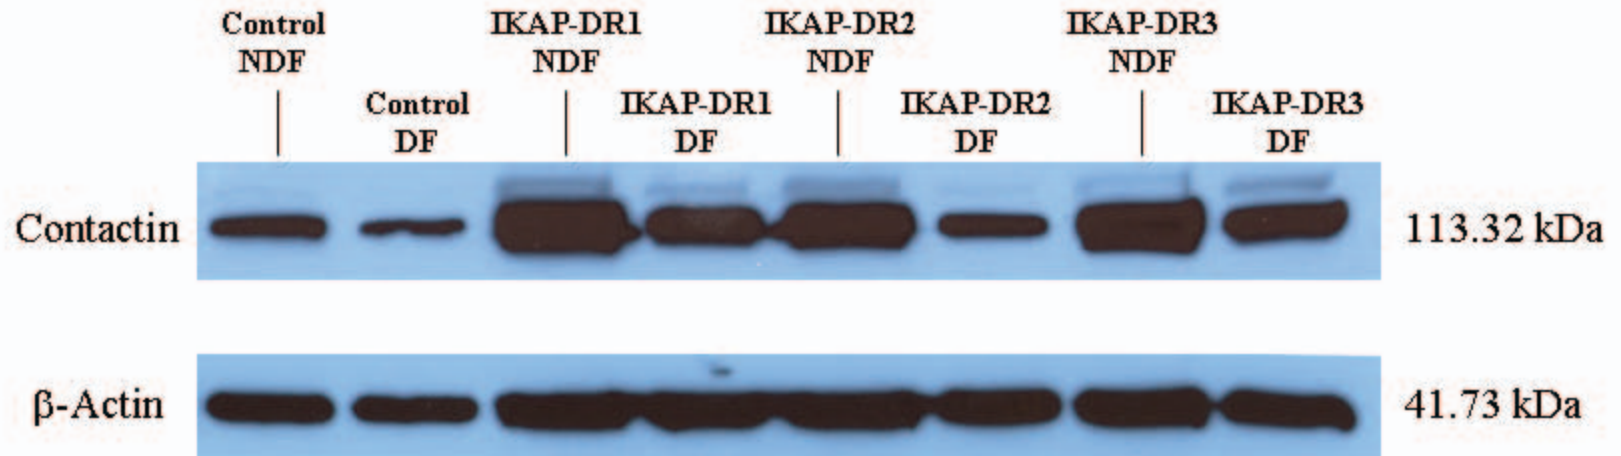

**Figure S2:** Protein expression of Contactin measured by Western blot analysis of IKAPDR1 (IKAPDR), IKAPDR2 and IKAPDR3 cell lines compared to control, under non differentiation (NDF) or differentiation growth conditions. Beta actin was used as a normalizer for protein loading. Protein size markers in kDa are on the right.
